# Supplementary material for: Tyrosine phosphorylation of DEPTOR functions as a molecular switch to activate mTOR signaling
Source: J Biol Chem. 2021 Oct 9;297(5):101291. doi: 10.1016/j.jbc.2021.101291 (PMC8551655; doi:10.1016/j.jbc.2021.101291)
Supplement: Supplemental Figures S1–S7 and Tables S1, S2 [file mmc1.pdf]

## **SUPPLEMENTAL FIGURE LEGENDS**

### **Tyrosine Phosphorylation of DEPTOR Functions as a Molecular Switch to Activate mTOR Signaling**

#### **Figure S1. Tyrosine 289 of DEPTOR is phosphorylated.**

**A)** 293T cells were transfected with FLAG-YFP, FLAG-DEPTOR-D4-HA or HA-GFP to validate the integrity of the D4 fragment.

**B)** 293T cells transfected with FLAG-YFP (control) and FLAG-DEPTOR-D4 were lysed for a FLAG-tag denaturing immunoprecipitation. FLAG-DEPTOR-D4 immunoprecipitate were separated in two samples, one of which was treated with phosphatase to confirm DEPTOR-D4 tyrosine phosphorylation.

**C)** DEPTOR sequences, corresponding to the D4 fragments, from different species were aligned to assess conserved tyrosine residues during evolution (\*).

A

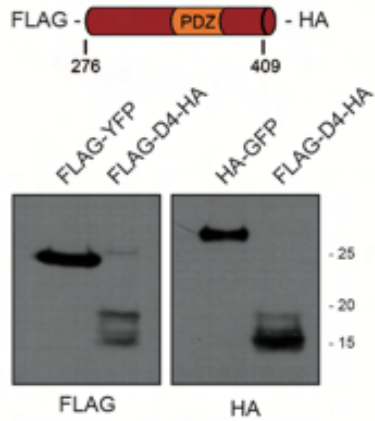

B

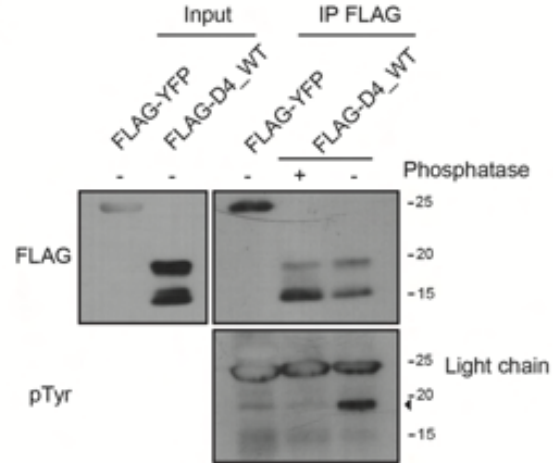

C

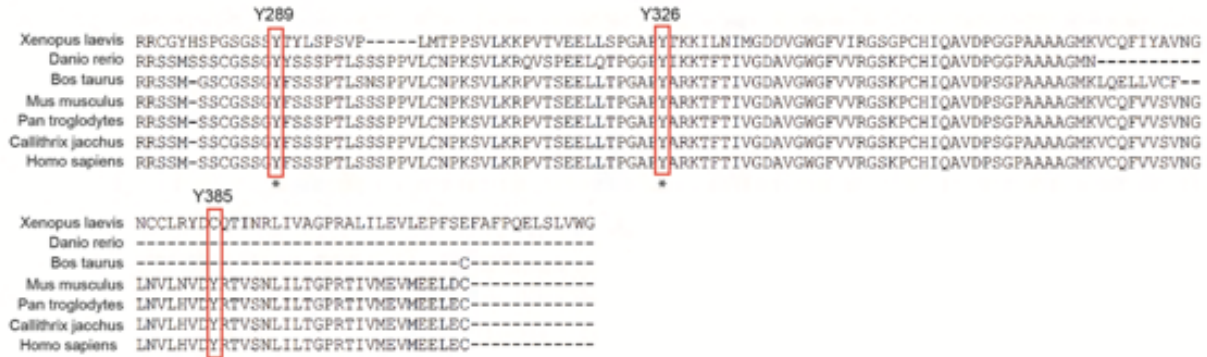

Figure suppl 1

**Figure S2. Efficiency of DEPTOR depletion and determining the effect of Tyrosine 289 phosphorylation on  $\beta$ -TRCP1 association.**

**A)** HeLa cells were infected with a Non-target sh (shNT) and two DEPTOR sh (shDEPTOR 3 and 5).

DEPTOR protein level was measured in both conditions.

**B)** b-TRCP1 detection in FLAG immunoprecipitate made using 293T cells overexpressing FLAG-YFP,

FLAG-DEPTOR<sup>WT</sup> and FLAG-DEPTOR<sup>Y289E</sup>.

A

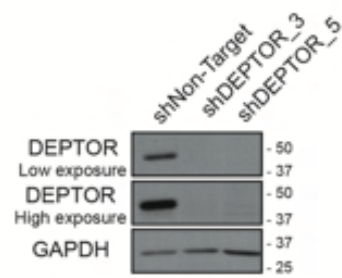

B

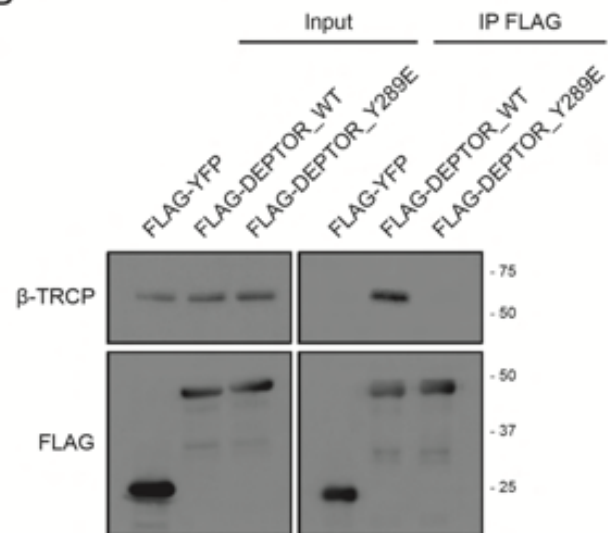

Figure suppl 2

**Figure S3. Range of PP242 and PP2 concentration to assess the impact on Y289 phosphorylation.**

**A)** 293T cells were transfected with FLAG-DEPTOR-D4 and treated with DMSO (untreated) or PP242 at increasing concentration (0, 0.01, 0.05, 0.25, 0.5, 1.0, 2.0, 5.0 or 10.0  $\mu$ M), for 2 hours. Cell lysates were used to perform a denaturing FLAG immunoprecipitation to reveal levels of DEPTOR phosphorylation.

**B)** 293T cells transfected with FLAG-DEPTOR-D4 were treated with DMSO (untreated) and PP2 at increasing concentration (0, 0.05, 0.5, 0.75, 1.0, 1.5, 2.0, or 10.0  $\mu$ M), for 2 hours. Cell lysates were used for a denaturing FLAG immunoprecipitation to reveal levels of DEPTOR-D4 phosphorylation.

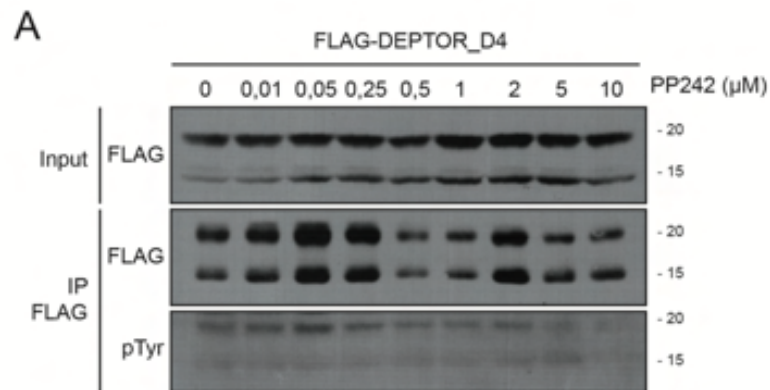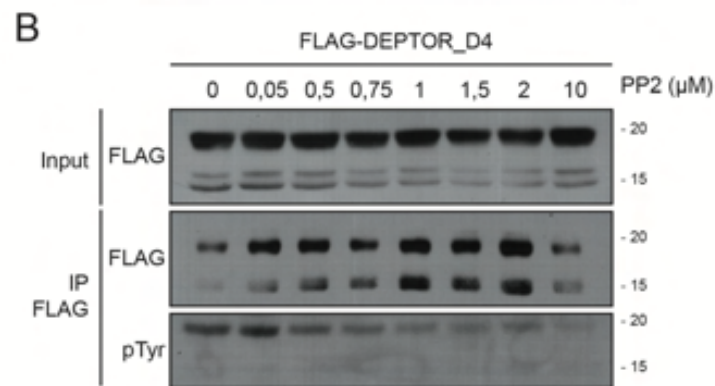

Figure suppl 3

**Figure S4. EPHB2 favours DEPTOR tyrosine phosphorylation.**

**A)** CaCo-2 cells were infected with shNT and shEPHB2\_3 and shEPHB2\_5. Cells were lysed 6 days post-infection to assess EPHB2 expression.

**B)** 293T cells depleted of EPHB2 were transfected with FLAG-YFP and FLAG-DEPTOR<sup>WT</sup>, as well as EPHB2. Each lysate was used for a denaturing FLAG immunoprecipitation to assess DEPTOR tyrosine phosphorylation.

**C)** 293T cells depleted of EPHB2 were transfected with FLAG-YFP, FLAG-DEPTOR-D4<sup>WT</sup> or FLAG-DEPTOR-D4<sup>Y289F</sup> in combination with EPHB2. Cells were lysed 48 hours post-transfection and used for a denaturing FLAG immunoprecipitation to assess DEPTOR-D4 tyrosine phosphorylation.

**D)** EPHB2 depleted HeLa cells were transfected with EPHB2<sup>WT</sup> or EPHB2<sup>KD</sup> (kinase dead). Cells were starved for 16 hours, pretreated with 50 µg/ml of cycloheximide for 1 hours, and stimulated with complete media supplemented with cycloheximide (50 µg/ml) for 0, 1, 2, 3, 4 and 6 hours to assess DEPTOR protein levels.

**E)** 293T cells transfected with EPHB2-GFP were treated with DMSO (untreated), PP242 (10 µM) or PP2 (10 µM) for 2 hours and cell lysates were made to perform a GFP pull-down and assess its phosphorylation state.

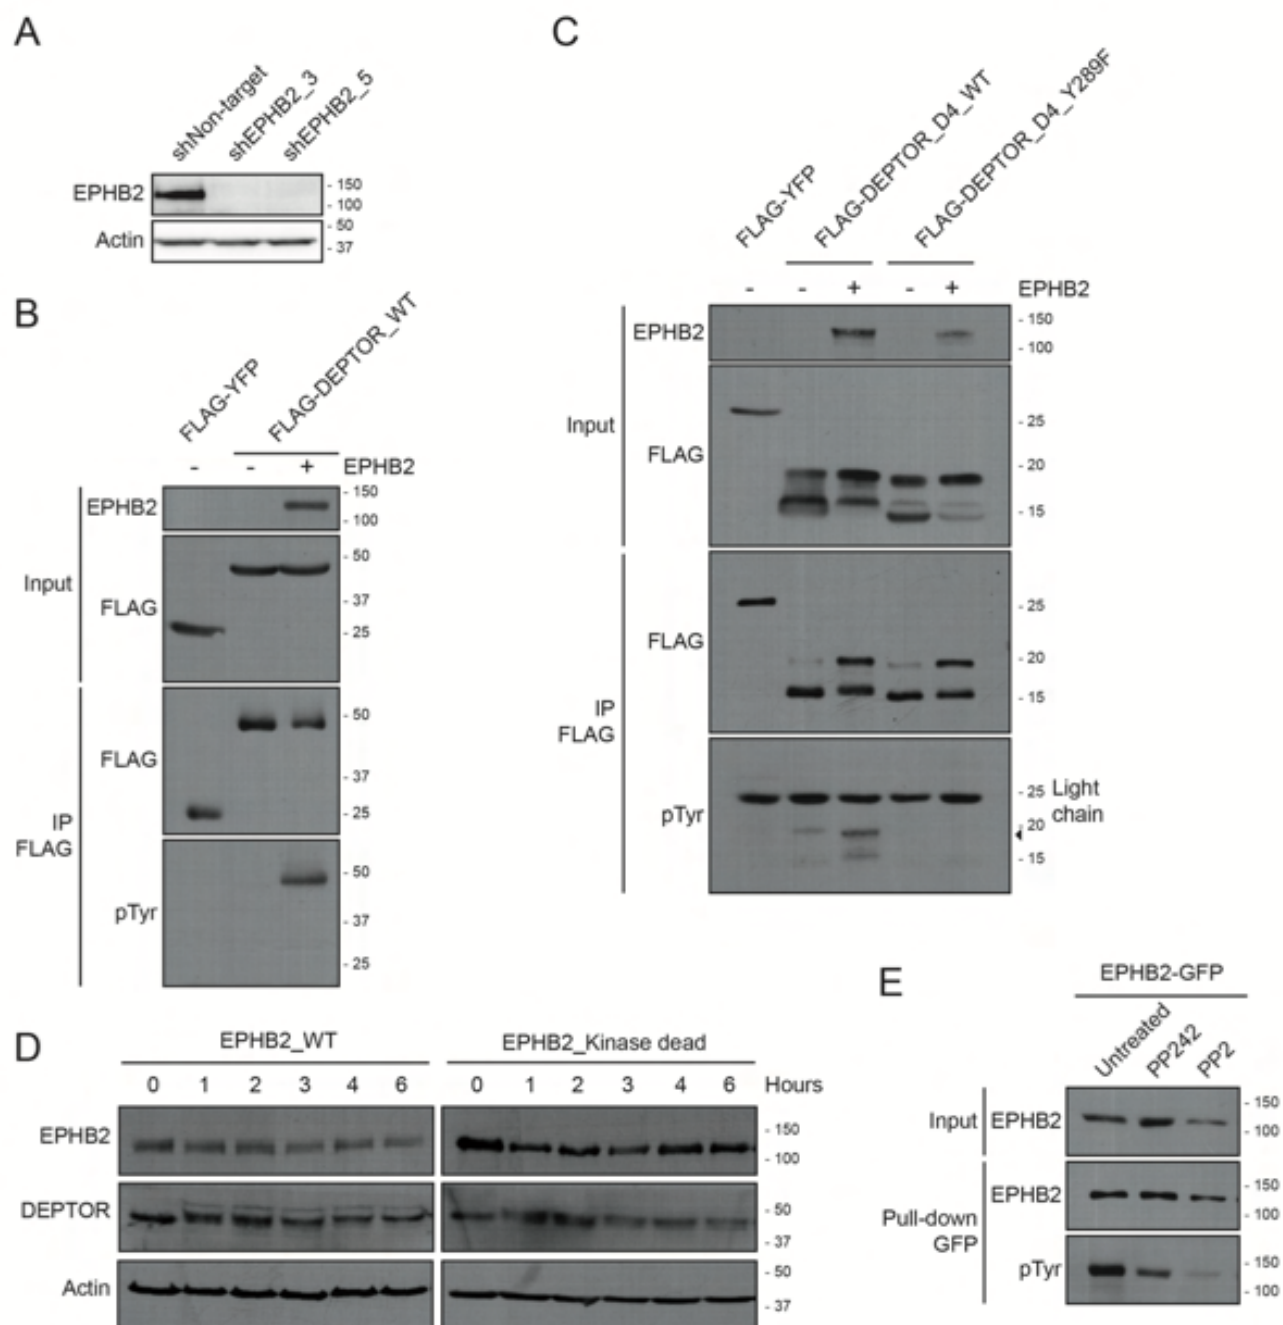

Figure suppl 4

**Figure S5. EPHB2 depletion decrease DEPTOR tyrosine phosphorylation.**

**A)** 293T and EPHB2 depleted 293T cells were transfected with FLAG-YFP or FLAG-DEPTOR-D4 and treated with 10  $\mu$ M of PP242 for 2 hours. Cells were lysed 48 hours post-infection and used for denaturing FLAG-tag immunoprecipitation.

**B)** 293T and EPHB2 depleted 293T cells were transfected with FLAG-YFP or FLAG-DEPTOR-D4 and treated with 10  $\mu$ M of PP2 for 2 hours. Cells were lysed and used for denaturing FLAG-tag immunoprecipitation.

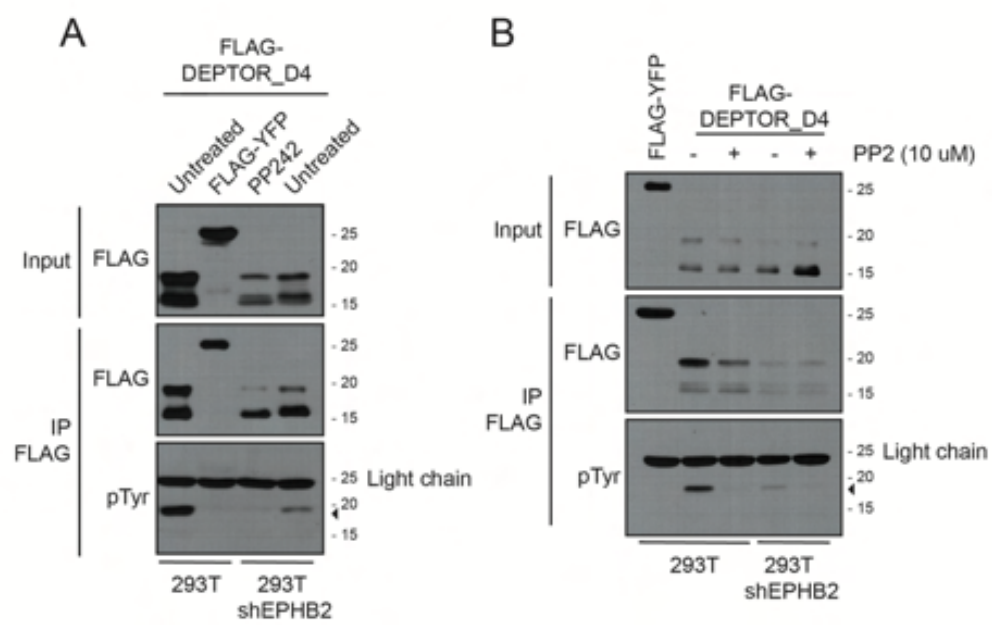

Figure suppl 5

**Figure S6. Validation of miniturboID construct.**

**A)** 293T cells infected with FLAG-GFP-MiniTurbo or FLAG-D4-MiniTurbo were incubated or not with 50  $\mu$ M of biotin for 1 hour. Cells were lysed to reveal biotinylated proteins by streptavidin antibody.

**B)** 293T cells infected with FLAG-GFP-MiniTurbo or FLAG-D4-MiniTurbo were incubated with 50  $\mu$ M of biotin for 1 hour. Cells were lysed and used for a streptavidin denaturing immunoprecipitation to assess auto-biotinylation and IP of the different partners of GFP and D4.

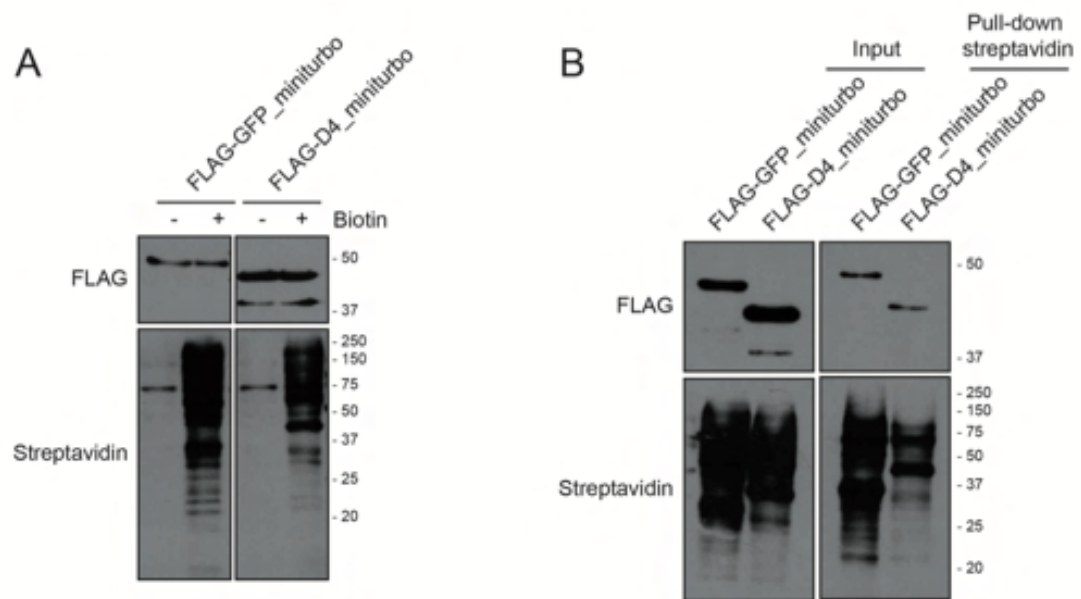

Figure suppl 6

**Figure S7. SYK promote tyrosine phosphorylation of DEPTOR**

**A)** 293T cells were infected with shNT, shSYK\_1 and shSYK\_2. Cells were lysed 48 hours post-infection to assess SYK expression.

**B)** 293T cells were transfected with FLAG-DEPTOR in combination with HA-GFP or HA-SYK. Cells were lysed 48 hours post-transfection and used for a denaturing FLAG immunoprecipitation to assess DEPTOR tyrosine phosphorylation.

**C)** 293T cells were transfected with HA-GFP or HA-SYK in combination with FLAG-DEPTOR-D4<sup>WT</sup> or FLAG-DEPTOR-D4<sup>Y289F</sup>. Cells were lysed 48 hours post-transfection and used for a denaturing FLAG immunoprecipitation to assess DEPTOR-D4 tyrosine phosphorylation.

A

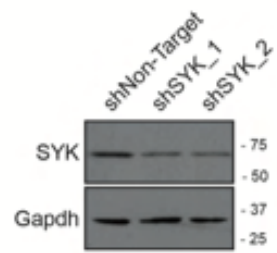

B

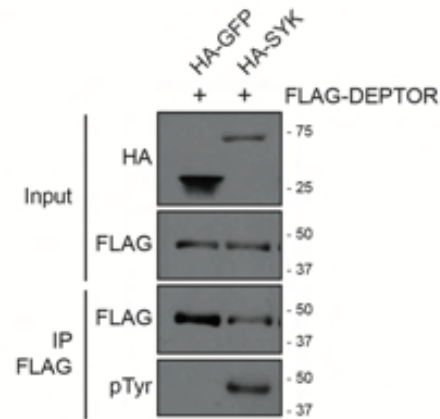

C

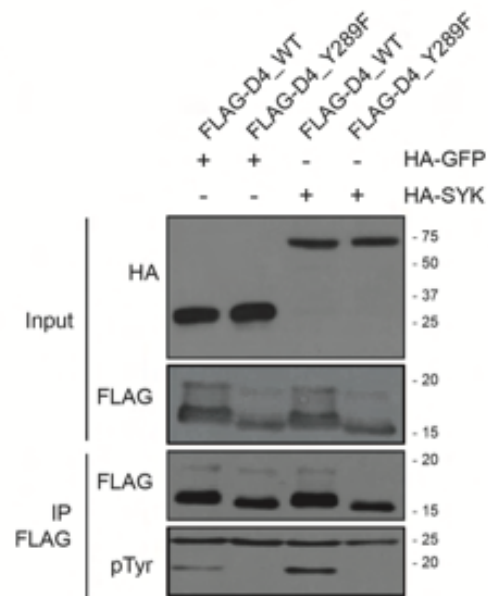

Figure suppl 7

**Table S1: PP242 secondary targets and their specific inhibitors.**

**Table S2: PP2 secondary targets and their specific inhibitors.**

|               | Potential target | IC50      | Other inhibitor               |
|---------------|------------------|-----------|-------------------------------|
| PP242 effects | mTOR             | 30-58 nM  | Torin                         |
|               | PKC              | 49-198 nM |                               |
|               | p110             | 100 nM    | Cal-101                       |
|               | Jak2             | 110 nM    | Ruxolitinib                   |
|               | Ret              | 224 nM    | Regorafenib                   |
|               | PDGFR            | 410 nM    | Sorafenib, Imatinib           |
|               | DNA-PK           | 410 nM    | Torin, Cal-101                |
|               | Hck              | 1,2 µM    | PP2                           |
|               | Src              | 1,4 µM    | PP2, SU6656, Dasatinib, SKI-I |
|               | VEGFR            | 1,5 µM    | Sorafenib, SKI-I              |
|               | EphB4            | 3,4 µM    | NVP-BHG712                    |
|               | Abl              | 3,6 µM    | Imatinib, Dasatinib           |
|               | EGFR             | 4,4 µM    | Lapatinib                     |

**Table S1**

|             | Potential target | IC50   | Other inhibitor          |
|-------------|------------------|--------|--------------------------|
| PP2 effects | Lck              | 4 nM   | SU6656, SKI-I, Dasatinib |
|             | Fyn              | 5 nM   | SU6656, Dasatinib        |
|             | Hck              | 5 nM   | PP242                    |
|             | Rip2             | 19 nM  | SKI-I                    |
|             | CKIδ             | 41 nM  | D 4476                   |
|             | Src              | 100 nM | SU6656, SKI-I, Dasatinib |
|             | EGFR             | 480 nM | Lapatinib                |
|             | CSK              | 730 nM | SKI-I                    |

**Table S2**

**Table S3: Protein Groups.** Protein Groups output from MaxQuant software

**Table S4: SAINT express output.** SAINT express output from analysis of DEPTOR D4 and GFP miniTurbo analysis

Both Table S3 and Table S4 are available in a single Excel sheet.
